# Supplementary material for: Fabrication of High Performance PVDF Hollow Fiber Membrane Using Less Toxic Solvent at Different Additive Loading and Air Gap
Source: MDPI journal article supplement (doi:10.3390/membranes11110843), 2021-10-29
Supplement: s1 [file s1]

Supplementary Material

# Fabrication of High Performance PVDF Hollow Fiber Membrane using Less Toxic Solvent at Different Additive Loading and Air Gap

Hazirah Syahirah Zakria<sup>1,2</sup>, Mohd Hafiz Dzarfhan Othman<sup>1,2,\*</sup>, Siti Hamimah Sheikh Abdul Kadir<sup>3,\*\*</sup>, Roziana Kamaludin<sup>1,2</sup>, Asim Jilani<sup>4</sup>, Muhammad Firdaus Omar<sup>5</sup>, Suriani Abu Bakar<sup>6</sup>, Juhana Jaafar<sup>1,2</sup>, Mukhlis A. Rahman<sup>1,2</sup>, Huda Abdullah<sup>7</sup>, Mohd Hafiz Puteh<sup>8</sup>, Oulavanh Sinsamphanh<sup>9</sup>, Muhammad Ayub<sup>1,2</sup>,

- 1 Advanced Membrane Technology Research Centre (AMTEC), Universiti Teknologi Malaysia, 81310 Skudai, Johor, Malaysia; hazirahzakria@gmail.com (H.S.Z.); roziana.kamaludin7@gmail.com (R.K.); juhana@petroleum.utm.my (J.J.); mukhlis@petroleum.utm.my (M.A.R.); ayub1977@graduate.utm.my (M.A.)
  - 2 School of Chemical and Energy Engineering, Faculty of Engineering, Universiti Teknologi Malaysia (UTM), 81310 Skudai, Johor, Malaysia;
  - 3 Institute of Pathology, Laboratory and Forensics (I-PPerForM), Faculty of Medicine, Universiti Teknologi MARA (UiTM), Cawangan Selangor, 47000 Sungai Buloh, Selangor, Malaysia
  - 4 Center of Nanotechnology, King Abdul-Aziz University, 21589 Jeddah, Saudi Arabia; asim.jilane@gmail.com
  - 5 Scientific Computing and Instrumentation (SCnI) Research Group, Physics Department, Faculty of Science, Universiti Teknologi Malaysia, 81310 Skudai, Johor, Malaysia; firdausomar@utm.my
  - 6 Nanotechnology Research Centre, Faculty of Science and Mathematics, Universiti Pendidikan Sultan Idris, 35900 Tanjung Malim, Perak, Malaysia; suriani@fsm.ups.edu.my
  - 7 Department of Electrical, Electronic & Systems Engineering, Faculty of Engineering & Built Environment, The National University of Malaysia 43600 Bangi, Selangor, Malaysia; huda.abdullah@ukm.edu.my
  - 8 School of Civil Engineering, Faculty of Engineering, Universiti Teknologi Malaysia, 81310 Skudai, Johor, Malaysia; mhafizputeh@utm.my
  - 9 Faculty of Environmental Science, National University of Laos, Dongdok, Campus, P.O.Box: 7322, Vientiane, LAO PDR; oulavanhnoi@gmail.com.
- \* Correspondence: hafiz@petroleum.utm.my
- \*\* Co-correspondence: sitih587@gmail.com

**Table S1.** Hazards statements of DMAc, DMF, NMP and TEP according to Regulation (EC) No 1272/2008 [7,8].

| Solvent | Regulation (EC) No 1272/2008 |                                        | Diseases                     |
|---------|------------------------------|----------------------------------------|------------------------------|
|         | Hazard codes                 | Hazard statements                      |                              |
| DMAc    | H312 + H332                  | Harmful when skin contacted or inhaled | Pancreatitis                 |
|         | H319                         | Causes serious eye irritation          |                              |
|         | H360D                        | May damage the unborn child            |                              |
| DMF     | H226                         | Flammable liquid and vapour            | Hepatitis, Testicular cancer |
|         | H312 + H332                  | Harmful when skin contacted or inhaled |                              |
|         | H319                         | Causes serious eye irritation          |                              |
|         | H360D                        | May damage the unborn child            |                              |

---

|     |             |                                        |                                    |
|-----|-------------|----------------------------------------|------------------------------------|
| NMP | H315 + H319 | Causes skin and serious eye irritation | Miscarriage, Light<br>birth weight |
|     | H335        | May cause respiratory irritation       |                                    |
|     | H360D       | May damage the unborn child            |                                    |
| TEP | H302        | Harmful if swallowed                   | -                                  |
|     | H319        | Causes serious eye irritation          |                                    |

---
